# Supplementary material for: The Association of Familial Hypertension and Risk of Gestational Hypertension and Preeclampsia
Source: MDPI journal article supplement (doi:10.3390/ijerph18137045), 2021-07-01
Supplement: s1 [file s1]

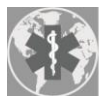

**Supplementary Table S1.** Unadjusted and adjusted odds ratios for the association between basic risk factors on gestational hypertension (GH) and preeclampsia (PE) (set of data).

| Risk factors               | Cases/Controls | OR (95% CI), <i>p</i>      | AOR-a (95% CI), <i>p</i>     |
|----------------------------|----------------|----------------------------|------------------------------|
|                            |                | GH risk                    |                              |
| Maternal age (years):      |                |                            |                              |
| ≥40                        | 16/59          | 3.23 (1.41–7.38); 0.005    | 2.97 (1.2–7.32) 0.018        |
| Age 18–24                  | 2/36           | 0.66 (0.14–3.12); 0.602    | 0.51 (0.1–2.53) 0.413        |
| 25–29 years                | 11/131         | 1                          | 1                            |
| Pre-pregnancy BMI (kg/m²): |                |                            |                              |
| Obesity (≥30)              | 31/58          | 5.60 (3.32–9.43); <0.001   | 4.72 (2.73–8.14) <0.001      |
| Overweight (25–29.9)       | 30/139         | 2.26 (1.39–3.68); 0.001    | 2.04 (1.23–3.37) 0.005       |
| Underweight (<18.5)        | 1/44           | 0.24 (0.03–1.76); 0.160    | 0.23 (0.03–1.69); 0.148      |
| Normal BMI (18.5–24.9)     | 51/534         | 1                          | 1                            |
| GWG above the range        | 62/263         | 2.45 (1.53–3.92); < 0.001  | 1.9 (1.15–3.12); 0.012       |
| GWG in the range           | 29/301         | 1                          | 1                            |
| GWG below the range        | 22/211         | 1.08 (0.61–1.94); 0.790    | 1.09 (0.59–2.01); 0.779      |
| Smoking in the 1st tr.     | 17/37          | 3.60 (1.94–6.68); <0.001   | 3.51 (1.79–6.89); <0.001     |
| Smoking before pregnancy   | 31/133         | 1.83 (1.16–2.87); 0.009    | 1.64 (1.01–2.66); 0.044      |
| Never smoked               | 82/642         | 1                          | 1                            |
| Prior GH/PE                | 12/4           | 22.9 (7.25–72.36); <0.001  | 37.98 (11.16–129.26); <0.001 |
| No prior GH/PE             | 101/771        | 1                          | 1                            |
| Primiparity                | 53/318         | 1.27 (0.85–1.89); 0.238    | 1.90 (1.22–2.96); 0.005      |
| Multiparity                | 60/457         | 1                          | 1                            |
| Infertility treatment      | 8/29           | 1.96 (0.87–4.4); 0.103     | 1.65 (0.68–4.01); 0.269      |
| No Infertility treatment   | 105/746        | 1                          | 1                            |
| PE risk                    |                |                            |                              |
| Maternal age (years):      |                |                            |                              |
| ≥40                        | 1/59           | 1.11 (0.1–12.49); 0.933    | 0.94 (0.08–11.61); 0.963     |
| 25–29                      | 2/131          | 1                          | 1                            |
| 18–24                      | 2/36           | 3.64 (0.5–26.74); 0.204    | 3.26 (0.42–25.04); 0.256     |
| Pre-pregnancy BMI (kg/m²): |                |                            |                              |
| Obesity (≥30)              | 9/58           | 9.21 (3.52–24.11); < 0.001 | 8.68 (3.25–23.18); <0.001    |
| Overweight (25–29.9)       | 4/139          | 1.71 (0.52–5.63); 0.379    | 1.68 (0.5–5.63); 0.397       |
| Underweight (<18.5)        | 2/44           | 2.70 (0.57–12.87); 0.213   | 2.56 (0.52–12.62); 0.248     |
| Normal BMI (18.5–24.9)     | 9/534          | 1                          | 1                            |
| GWG above the range        | 11/263         | 1.57 (0.62–3.97); 0.337    | 1.15 (0.44–3); 0.770         |
| GWG in the range           | 8/301          | 1                          | 1                            |
| GWG below the range        | 5/211          | 0.89 (0.29–2.76); 0.842    | 0.84 (0.26–2.67); 0.768      |
| Smoking in the 1st tr.     | 3/37           | 2.60 (0.74–9.16); 0.136    | 2.79 (0.76–10.27); 0.124     |
| Smoking before pregnancy   | 4/133          | 0.97 (0.33–2.87); 0.950    | 0.88 (0.29–2.65); 0.817      |
| Never smoked               | 20/642         | 1                          | 1                            |
| Prior GH/PE                | 3/4            | 27.54 (5.8–130.83); <0.001 | 31.11 (5.83–165.98); <0.001  |
| No prior GH/PE             | 21/771         | 1                          | 1                            |
| Primiparity                | 11/318         | 1.22 (0.54–2.75); 0.638    | 1.55 (0.64–3.77); 0.332      |
| Multiparity                | 13/457         | 1                          | 1                            |
| Infertility treatment      | 3/29           | 3.68 (1.04–13.03); 0.044   | 4.29 (1.06–17.39); 0.041     |
| No infertility treatment   | 21/746         | 1                          | 1                            |

\* AOR-a: adjusted odds ratios (and 95% confidence intervals) of GH and PE calculated in multiple logistic regression in model-a; the results were adjusted for maternal age, pre-pregnancy BMI, primiparity, gestational weight gain (GWG) out of the range and smoking in the first trimester (*p*-value < 0.05 was assumed to be significant). GH: gestational hypertension; PE: preeclampsia. Controls: normotensive women.

**Supplementary Table S2.** Unadjusted and adjusted odds ratios for the association between paternal and maternal hypertension on gestational hypertension (GH) and preeclampsia (PE), compared to ‘Absence of hypertension in the parents’

| Risk factors/Hypertension in the parents | Cases/Controls | OR (95% CI); <i>p</i>    | AOR-a (95% CI); <i>p</i> * | AOR-b (95% CI); <i>p</i> * |
|------------------------------------------|----------------|--------------------------|----------------------------|----------------------------|
| <b>GH risk</b>                           |                |                          |                            |                            |
| In the mother                            | 31/137         | 2.01 (1.25–3.21); 0.004  | 1.61 (0.97–2.67); 0.065    | 1.46 (0.86–2.48); 0.165    |
| In the father                            | 33/135         | 2.17 (1.36–3.45); 0.001  | 2.09 (1.27–3.44); 0.004    | 2.03 (1.21–3.42); 0.008    |
| In the mother or father                  | 51/230         | 1.97 (1.31–2.94); 0.001  | 1.75 (1.14–2.69); 0.010    | 1.65 (1.06–2.58); 0.028    |
| In the mother and father **              | 13/42          | 2.75 (1.40–5.40); 0.003  | 2.31 (1.11–4.82); 0.025    | 2.14 (0.98–4.65); 0.056    |
| Ref ***                                  | 61/541         | 1                        | 1                          | 1                          |
| <b>PE risk</b>                           |                |                          |                            |                            |
| In the mother                            | 11/137         | 3.95 (1.68–9.30); 0.002  | 3.28 (1.34–8.04); 0.009    | 3.12 (1.24–7.85); 0.016    |
| In the father                            | 5/135          | 1.82 (0.62–5.33); 0.274  | 1.58 (0.52–4.76); 0.416    | 1.37 (0.42–4.53); 0.605    |
| In the mother or father                  | 13/230         | 2.78 (1.23–6.30); 0.014  | 2.35 (1.02–5.45); 0.046    | 2.15 (0.89–5.17); 0.088    |
| In the mother and father **              | 3/42           | 3.51 (0.94–13.08); 0.061 | 2.78 (0.69–11.24); 0.151   | 2.57 (0.59–11.2); 0.207    |
| Ref ***                                  | 11/541         | 1                        | 1                          | 1                          |

\* AOR: adjusted odds ratios (and 95% confidence intervals) calculated in multiple logistic regression after adjusted for maternal age, pre-pregnancy BMI, primiparity, gestational weight gain (GWG) out of the range and smoking in the first trimester (AOR-a) plus prior hypertension in pregnancy and infertility treatment (AOR-b) (*p*-value < 0.05 was assumed to be significant); \*\* In the mother and father simultaneously; \*\*\* Reference category: ‘Absence of hypertension in the parents’. Cases: GH i.e. gestational hypertension; PE i.e. preeclampsia; Controls: normotensive women.
